# Supplementary material for: Virus induced gene silencing (VIGS) for functional analysis of wheat genes involved in Zymoseptoria tritici susceptibility and resistance
Source: PubMed Central journal article supplement (PMC4510315; doi:10.1016/j.fgb.2015.04.006), 2015-06

**Supplemental Figure 1.** A flow diagram of all the steps required for targeted silencing of wheat leaf genes using VIGS vectors and for assessment of *Z. tritici* infection in conjunction with VIGS.

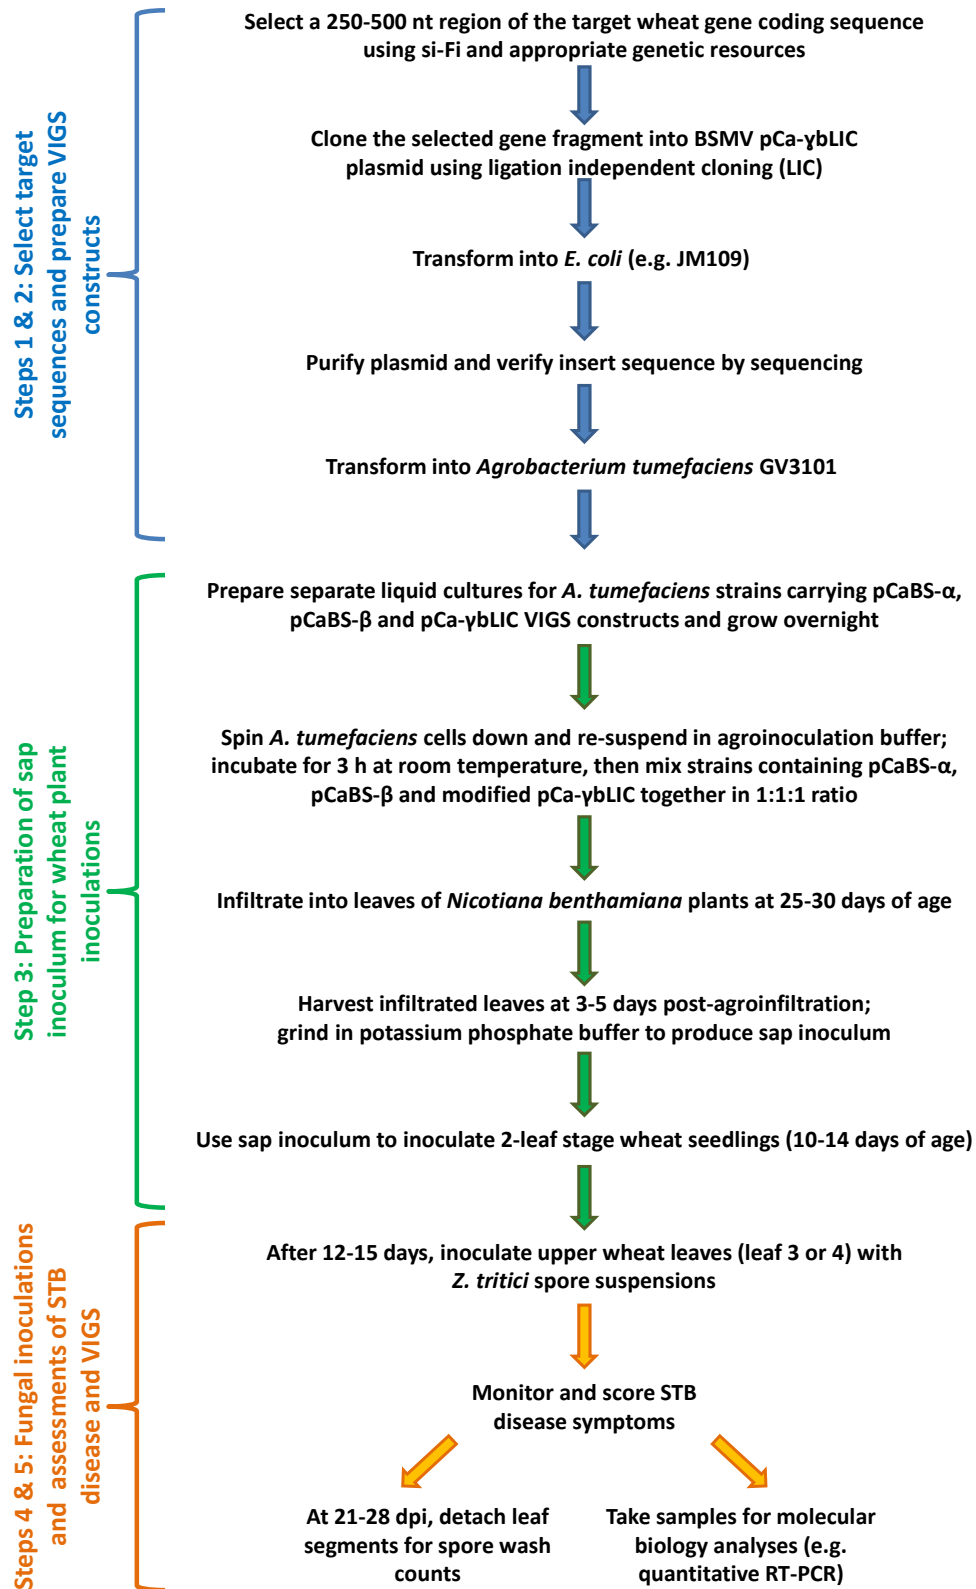

Supplement: mmc1.pdf [file mmc1.pdf]
